# Supplementary material for: Sewage sludge-based functional nanomaterials: development and applications
Source: Royal Society of Chemistry journal article supplement (doi:10.1039/c6en00177g), 2016-10-13
Supplement: c6en00177g1.pdf [file c6en00177g1.pdf]

**Electronic Supplementary Information for**

**Sewage sludge-based functional nanomaterials: development and applications**

Shi-Jie Yuan, Xiao-Hu Dai\*

State Key Laboratory of Pollution Control and Resource Reuse, College of  
Environmental Science and Engineering, Tongji University, Shanghai, 200092, China

**\*Corresponding author:**

Prof. Xiao-Hu Dai, Phone: +86-21-65986297; Fax: +86-21-65983602; E-mail:

[daixiaohu@tongji.edu.cn](mailto:daixiaohu@tongji.edu.cn)

Table S1. SS for synthesizing SFNs compared with other options for SS disposal

| SS disposal                                | Restrictions                                                                                                                                                                                                                                                                                                                                 | Reference                                                                                     |
|--------------------------------------------|----------------------------------------------------------------------------------------------------------------------------------------------------------------------------------------------------------------------------------------------------------------------------------------------------------------------------------------------|-----------------------------------------------------------------------------------------------|
| Landfilling                                | Release of heavy metals, organic pollutants and pathogens.<br>Surface and underground water contamination.<br>Leachate from landfill requires treatment.<br>The increasing price of land.                                                                                                                                                    | <i>Environ. Pollut.</i> 2002, 118, 393-399.                                                   |
| Ocean dumping                              | Release of heavy metals, organic pollutants and pathogens.<br>Destroy the marine environment.                                                                                                                                                                                                                                                | <i>Waste Manage.</i> 2012, 32, 1186-1195.                                                     |
| Incineration                               | Release of heavy metals.<br>The handling of solid residues, e.g. bed and filter ash.<br>Emissions of dioxins and furans, NO <sub>x</sub> , N <sub>2</sub> O, SO <sub>2</sub> , as HCl, HF and C <sub>x</sub> H <sub>y</sub> .<br>Permits of building an incineration plant.<br>Costs (including costs for treatment of flue gases and ashes) | <i>Chem. Eng. J.</i> 2003, 96, 197-205.                                                       |
| Land applications                          | Heavy metals accumulate in the topsoil and crops.<br>Acceptance from food industry and public.<br>Health effects and infectious risks.<br>The inclusion of emerging pathogens.                                                                                                                                                               | <i>Waste Manage.</i> 2008, 28, 347-358.<br><i>Environ. Sci. Technol.</i> 2011, 45, 5459-5469. |
| The advantages of SS for synthesizing SFNs |                                                                                                                                                                                                                                                                                                                                              |                                                                                               |
| SS for synthesizing SFNs                   | Convert approximately half of the organic matter into renewable liquid fuels and chemical feedstock<br>Concentrates the heavy metals in a solid carbonaceous residue                                                                                                                                                                         | <i>Water Res.</i> 2009, 43, 2569-2594;<br><i>Waste Manage.</i> 2012, 32, 1186-1195            |

Table S2. Synthesis and properties of the SFNs

| Starting materials                              | Synthesis process                                                                      | Property                                                  | Activity                                                                                 | Synergistically enhanced performances                                                                                     | Reference                                                    |
|-------------------------------------------------|----------------------------------------------------------------------------------------|-----------------------------------------------------------|------------------------------------------------------------------------------------------|---------------------------------------------------------------------------------------------------------------------------|--------------------------------------------------------------|
| SS<br>$\text{FeSO}_4 \cdot 7\text{H}_2\text{O}$ | One-step method combining synthesis with loading                                       | SS-derived char supported $\text{Fe}_3\text{O}_4$         | Heterogeneous Fenton-like catalyst                                                       | $\text{SiO}_2$ and $\text{Al}_2\text{O}_3$ of the SS strongly correlates with the high catalytic performance              | <i>Chem. Eng. J.</i> 2012, <b>185-186</b> , 44-51.           |
| SS<br>$\text{FeSO}_4 \cdot 7\text{H}_2\text{O}$ | One-step method combining synthesis with loading                                       | SS-supported $\text{Fe}_2\text{O}_3$                      | Heterogeneous catalyst for photo-Fenton reaction under both UV and vis light irradiation | One-electron transfer between the specific small inorganic molecular or metal oxides in the SS and the loaded Fe compound | <i>Appl. Catal. B: Environ.</i> , 2014, <b>154</b> , 252-258 |
| SS iron sludge                                  | One-step method combining carbonization and Fe-loading                                 | SS-derived carbon-supported iron oxide                    | Three-dimensional heterogeneous electro-Fenton oxidation                                 | Unique Fe species embedded in carbon matrix structure                                                                     | <i>J. Taiwan Inst. Chem. E.</i> , 2016, <b>60</b> , 352-360. |
| SS                                              | One-step pyrolysis method at 800 °C                                                    | Sludge Carbon                                             | Microparticle electrode for adsorption and electro-oxidation                             | Co-Fenton-like effect of the $\text{SiO}_2$ and $\text{Al}_2\text{O}_3$                                                   | <i>Ind. Eng. Chem. Res.</i> , 2015, <b>54</b> , 5468-5474.   |
| SS                                              | Physicochemical activation and carbonization                                           | SS-derived porous carbon with magnetic property           | Adsorption and Fenton-like degradation                                                   | Co-catalytic effect of carbon plane, iron oxide and other mineral like silica or alumina                                  | <i>J. Hazard. Mater.</i> , 2013 <b>246-247</b> , 145-153.    |
| SS                                              | KOH activation, microwave digestion in the $\text{HNO}_3$ solutions at pH 1, pyrolysis | Magnetic porous carbon containing $\text{Fe}_3\text{O}_4$ | Fenton-like degradation                                                                  | Co-catalytic effect of carbon plane, iron oxide and other mineral like silica or alumina                                  | <i>Bioresour. Technol.</i> , 2014, <b>118</b> , 638-642.     |
| SS                                              | SS-derived carbonaceous                                                                | SS-derived carbon                                         | Fenton-like wet                                                                          | Co-catalytic effect of the                                                                                                | <i>RSC Adv.</i> , 2015, <b>5</b> ,                           |

|                                            |                                                                                                                                       |                                        |                                   |                                                                                                                                                           |                                                               |
|--------------------------------------------|---------------------------------------------------------------------------------------------------------------------------------------|----------------------------------------|-----------------------------------|-----------------------------------------------------------------------------------------------------------------------------------------------------------|---------------------------------------------------------------|
|                                            | materials treated with different kinds of acid                                                                                        | with surface modification              | peroxide oxidation                | surface-modified groups after oxyacid treatment with the co-catalytic effect of the inherent component of the SS, Fe <sup>3+</sup> , and SiO <sub>2</sub> | 41867-41876.                                                  |
| SS                                         | Carbonization; physical activation (steam or CO <sub>2</sub> ) and chemical activation (K <sub>2</sub> CO <sub>3</sub> ); HCl washing | SS-based activated carbons             | Wet air oxidation                 | Free radicals generated by the surface functional carbonyl group and the active metal species (especially Fe species)                                     | <i>Appl. Catal. B: Environ.</i> , 2011, <b>101</b> , 306-316. |
| SS                                         | Carbonization; physical activation (steam or CO <sub>2</sub> ) and chemical activation (K <sub>2</sub> CO <sub>3</sub> ); HCl washing | SS-based activated carbons             | Wet air oxidation                 | Free radicals generated by the surface functional carbonyl group and the active metal species (especially Fe species)                                     | <i>Appl. Catal. B: Environ.</i> , 2011, <b>110</b> , 81-89.   |
| SS                                         | Carbonization, different kinds of acids washing                                                                                       | SS-based carbons                       | Wet air oxidation                 | High content of iron and surface functional groups                                                                                                        | <i>Catal. Sci. Technol.</i> , 2016, <b>6</b> , 1085-1093.     |
| SS<br>FeSO <sub>4</sub> ·7H <sub>2</sub> O | One-step method combining the carbon synthesis with the Fe loading                                                                    | SS-derived carbon-supported iron oxide | Wet air oxidation                 | High content of iron and surface functional groups                                                                                                        | <i>J. Hazard. Mater.</i> , 2014, <b>276</b> , 88-96.          |
| SS                                         | Physicochemical activation and carbonization                                                                                          | SS-derived carbon                      | Heterogeneous catalytic ozonation | SS-derived carbon-based SFN with O <sub>3</sub>                                                                                                           | <i>J. Hazard. Mater.</i> , 2012, <b>239-240</b> , 381-388.    |
| SS<br>Mn and Fe                            | ZnCl <sub>2</sub> activation, carbonization, wet                                                                                      | SS based activated carbon supported    | Heterogeneous catalytic ozonation | SS-derived carbon-based SFN with O <sub>3</sub>                                                                                                           | <i>Bioresour. Technol.</i> , 2014, <b>166</b> , 178-186.      |

|                                             |                                                          |                                                          |                                              |                                                                                                                      |                                                          |
|---------------------------------------------|----------------------------------------------------------|----------------------------------------------------------|----------------------------------------------|----------------------------------------------------------------------------------------------------------------------|----------------------------------------------------------|
| nitrate                                     | impregnation                                             | manganese and ferric oxides                              |                                              |                                                                                                                      |                                                          |
| SS<br>TiOSO <sub>4</sub> ·2H <sub>2</sub> O | One-step hydrothermal process                            | Sewage sludge support and in situ doped TiO <sub>2</sub> | Heterogeneous TiO <sub>2</sub> photocatalyst | <i>In situ</i> doping of TiO <sub>2</sub> with transition metals (Fe, Cu, and Cr) originating from the sewage sludge | <i>RSC Adv.</i> , 2014, <b>4</b> , 61036-61044.          |
| SS                                          | Facile one-step pyrolysis process, immersed in 20 wt% HF | N, O-codoped SFN                                         | Electrochemical energy storage               | Hierarchical porous structure and heteroatom doping effects                                                          | <i>RSC Adv.</i> , 2015, <b>5</b> , 45827-45835.          |
| SS                                          | Carbonization, 30% HF solution and KOH activation        | 3D honeycomb-like hierarchically structured carbon       | Electrochemical energy storage               | Hierarchically structured                                                                                            | <i>J. Mater. Chem. A</i> , 2015, <b>3</b> , 15225-15234. |
| SS                                          | One-step carbonation process                             | SS biochars                                              | ORR electrocatalysts                         | Abundant micropores, and high nitrogen and iron contents                                                             | <i>Bioresour. Technol.</i> , 2013, <b>144</b> , 115-120. |
| SS                                          | One-step carbonation process, acids washing              | N, Fe, and S co-doped carbon                             | ORR electrocatalysts                         | Multi-doped heteroatoms                                                                                              | <i>Sci. Rep.</i> , 2016, <b>6</b> , 27570.               |
| SS<br>coconut shells                        | Mixed, carbonation                                       | SS-derived biochar                                       | ORR electrocatalysts                         | Enhanced electrical conductivity, N, P, and the N-coordinated Fe groups                                              | <i>J. Mater. Chem. A</i> , 2015, <b>3</b> , 8475-8482.   |
| SS                                          | Carbonation in NH <sub>3</sub> , HCl washed              | N, Fe, and S multi-doped carbon                          | ORR electrocatalysts                         | Multi-doped heteroatoms                                                                                              | <i>Green Chem.</i> 2016, <b>18</b> , 4004-4011.          |
